# Supplementary material for: Anti-CD38 monoclonal antibody impairs CD34+ mobilization and affects clonogenic potential in multiple myeloma patients
Source: PubMed Central journal article supplement — Blood Transfus. 2024 Jul 12;22(4):328–37. doi: 10.2450/BloodTransfus.667 (PMC11251823; doi:10.2450/bloodtransfus.667), 2024-07-12
Supplement: BLT-22-328_Online_Content.pdf [file BLT-22-328_Online_Content.pdf]

**ONLINE SUPPLEMENTARY CONTENT**

**Table SI - Characteristics of the first two apheresis procedures for the total No.=41 patients**

| Patient | Daratumumab | Vascular access | CD34+ count at 1 <sup>st</sup> harvest | TBV processed during the 1 <sup>st</sup> harvest | CD34+ ×10 <sup>6</sup> /kg collected at 1 <sup>st</sup> harvest | CD34+ count at 2 <sup>nd</sup> harvest | TBV processed during the 2 <sup>nd</sup> harvest | CD34+ ×10 <sup>6</sup> /kg collected at 2 <sup>nd</sup> harvest | Tot No. of aphereses | Plerixafor |
|---------|-------------|-----------------|----------------------------------------|--------------------------------------------------|-----------------------------------------------------------------|----------------------------------------|--------------------------------------------------|-----------------------------------------------------------------|----------------------|------------|
| #1      | Y           | Peripheral      | 3.35                                   | 3                                                | 9.184                                                           | N/A                                    | N/A                                              | N/A                                                             | 1                    | Y          |
| #2      | Y           | Peripheral      | 54.00                                  | 3                                                | 8.628                                                           | N/A                                    | N/A                                              | N/A                                                             | 1                    | N          |
| #3      | Y           | Peripheral      | 63.29                                  | 3                                                | 6.900                                                           | N/A                                    | N/A                                              | N/A                                                             | 1                    | N          |
| #4      | Y           | Central         | 74.44                                  | 3                                                | 6.367                                                           | N/A                                    | N/A                                              | N/A                                                             | 1                    | N          |
| #5      | Y           | Peripheral      | 17.21                                  | 3                                                | 1.680                                                           | 32.93                                  | 3                                                | 3.610                                                           | 2                    | Y          |
| #6      | Y           | Peripheral      | 26.12                                  | 3                                                | 1.941                                                           | 12.48                                  | 3                                                | 1.026                                                           | 4                    | N          |
| #7      | Y           | Peripheral      | 11.85                                  | 3                                                | 1.728                                                           | 14.38                                  | 3                                                | 1.457                                                           | 4                    | Y          |
| #8      | Y           | Peripheral      | 43.00                                  | 3                                                | 3.808                                                           | 48.00                                  | 3                                                | 4.136                                                           | 2                    | N          |
| #9      | Y           | Peripheral      | 39.15                                  | 3                                                | 3.235                                                           | 39.81                                  | 3                                                | 3.826                                                           | 2                    | N          |
| #10     | Y           | Peripheral      | 65.90                                  | 3                                                | 5.468                                                           | N/A                                    | N/A                                              | N/A                                                             | 1                    | N          |
| #11     | Y           | Peripheral      | 20.00                                  | 3                                                | 2.699                                                           | 26.00                                  | 3                                                | 3.867                                                           | 2                    | Y          |
| #12     | Y           | Central         | 39.10                                  | 3                                                | 5.290                                                           | 55.90                                  | 1                                                | 1.240                                                           | 2                    | N          |
| #13     | Y           | Peripheral      | 56.94                                  | 3                                                | 5.474                                                           | 22.79                                  | 1.5                                              | 3.181                                                           | 2                    | N          |
| #14     | Y           | Peripheral      | 52.09                                  | 3                                                | 4.279                                                           | 33.19                                  | 3                                                | 4.669                                                           | 2                    | N          |
| #15     | Y           | Central         | 37.19                                  | 3                                                | 3.771                                                           | 23.81                                  | 3                                                | 2.801                                                           | 2                    | N          |
| #16     | Y           | Peripheral      | 42.12                                  | 3                                                | 4.151                                                           | 42.70                                  | 2.5                                              | 2.635                                                           | 2                    | N          |
| #17     | Y           | Peripheral      | 35.23                                  | 3                                                | 3.160                                                           | 65.75                                  | 2.5                                              | 4.936                                                           | 2                    | N          |
| #18     | Y           | Peripheral      | 41.04                                  | 3                                                | 4.434                                                           | 94.57                                  | 1.5                                              | 5.737                                                           | 2                    | N          |
| #19     | Y           | Peripheral      | 26.25                                  | 3                                                | 2.889                                                           | 21.25                                  | 3                                                | 2.388                                                           | 2                    | N          |
| #20     | Y           | Peripheral      | 18.81                                  | 3                                                | 1.722                                                           | 16.16                                  | 3                                                | 1.336                                                           | 4                    | N          |
| #21     | N           | Peripheral      | 139.86                                 | 2,5                                              | 16.846                                                          | N/A                                    | N/A                                              | N/A                                                             | 1                    | N          |
| #22     | N           | Peripheral      | 145.00                                 | 2                                                | 7.693                                                           | N/A                                    | N/A                                              | N/A                                                             | 1                    | N          |
| #23     | N           | Peripheral      | 101.12                                 | 2,5                                              | 9.107                                                           | N/A                                    | N/A                                              | N/A                                                             | 1                    | N          |
| #24     | N           | Peripheral      | 180.00                                 | 2                                                | 14.201                                                          | N/A                                    | N/A                                              | N/A                                                             | 1                    | N          |
| #25     | N           | Peripheral      | 52.79                                  | 3                                                | 6.432                                                           | N/A                                    | N/A                                              | N/A                                                             | 1                    | N          |
| #26     | N           | Peripheral      | 84.53                                  | 3                                                | 7.358                                                           | N/A                                    | N/A                                              | N/A                                                             | 1                    | N          |
| #27     | N           | Central         | 121.54                                 | 2,5                                              | 10.960                                                          | N/A                                    | N/A                                              | N/A                                                             | 1                    | N          |
| #28     | N           | Peripheral      | 64.21                                  | 3                                                | 6.872                                                           | N/A                                    | N/A                                              | N/A                                                             | 1                    | N          |
| #29     | N           | Peripheral      | 69.50                                  | 3                                                | 8.635                                                           | N/A                                    | N/A                                              | N/A                                                             | 1                    | N          |
| #30     | N           | Peripheral      | 161.75                                 | 1,5                                              | 8.109                                                           | N/A                                    | N/A                                              | N/A                                                             | 1                    | N          |
| #31     | N           | Peripheral      | 75.82                                  | 3                                                | 8.302                                                           | N/A                                    | N/A                                              | N/A                                                             | 1                    | N          |
| #32     | N           | Central         | 76.90                                  | 3                                                | 8.247                                                           | N/A                                    | N/A                                              | N/A                                                             | 1                    | N          |
| #33     | N           | Peripheral      | 34.04                                  | 3                                                | 6.080                                                           | N/A                                    | N/A                                              | N/A                                                             | 1                    | N          |
| #34     | N           | Peripheral      | 18.89                                  | 3                                                | 1.631                                                           | 9.40                                   | 3                                                | 0.954                                                           | 2                    | N          |
| #35     | N           | Peripheral      | 54.73                                  | 3                                                | 4.460                                                           | 40.60                                  | 3                                                | 3.406                                                           | 2                    | N          |
| #36     | N           | Peripheral      | 44.73                                  | 3                                                | 5.300                                                           | N/A                                    | N/A                                              | N/A                                                             | 1                    | Y          |
| #37     | N           | Peripheral      | 15.70                                  | 3                                                | 1.712                                                           | 10.92                                  | 3                                                | 1.027                                                           | 2                    | N          |
| #38     | N           | Peripheral      | 63.62                                  | 3                                                | 5.262                                                           | N/A                                    | N/A                                              | N/A                                                             | 1                    | N          |
| #39     | N           | Peripheral      | 40.18                                  | 3                                                | 5.051                                                           | 48.58                                  | 3                                                | 2.837                                                           | 2                    | N          |
| #40     | N           | Peripheral      | 55.05                                  | 3                                                | 3.823                                                           | 67.50                                  | 2.5                                              | 3.920                                                           | 2                    | N          |
| #41     | N           | Central         | 53.88                                  | 3                                                | 5.301                                                           | N/A                                    | N/A                                              | N/A                                                             | 1                    | N          |

N: no; Y: yes; N/A: not applicable.

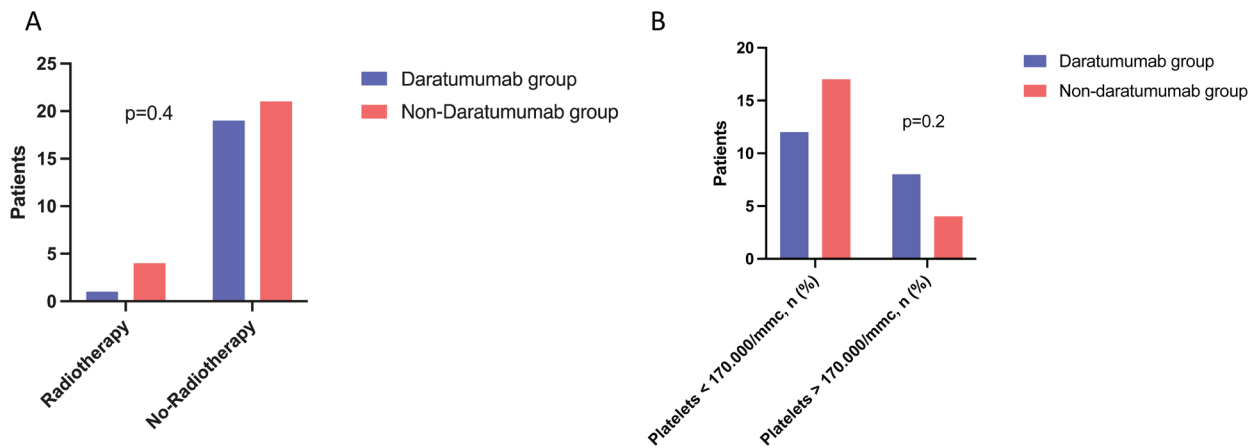

**Figure S1 - Induction therapy, radiotherapy and platelets number**

**A)** Number of patients who did or did not undergo radiotherapy before CD34+ mobilization in the two induction therapy groups: daratumumab (blue) and non-daratumumab (red). **B)** Number of patients who had less than or more than 170.000/mmc platelets in the two induction therapy groups: daratumumab (blue) and non-daratumumab (red).

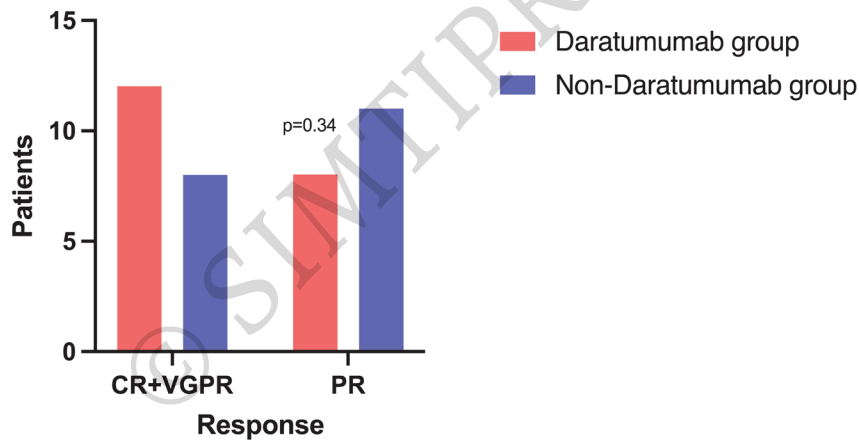

**Figure S2 - Induction therapy and clinical response**

Number of daratumumab-treated (red) and non-daratumumab treated patients (blue) who had achieved complete response (CR) or very good partial response (VGPR) at the time of CD34+ mobilization as opposed to patients who were reported to have achieved only a partial response (PR).

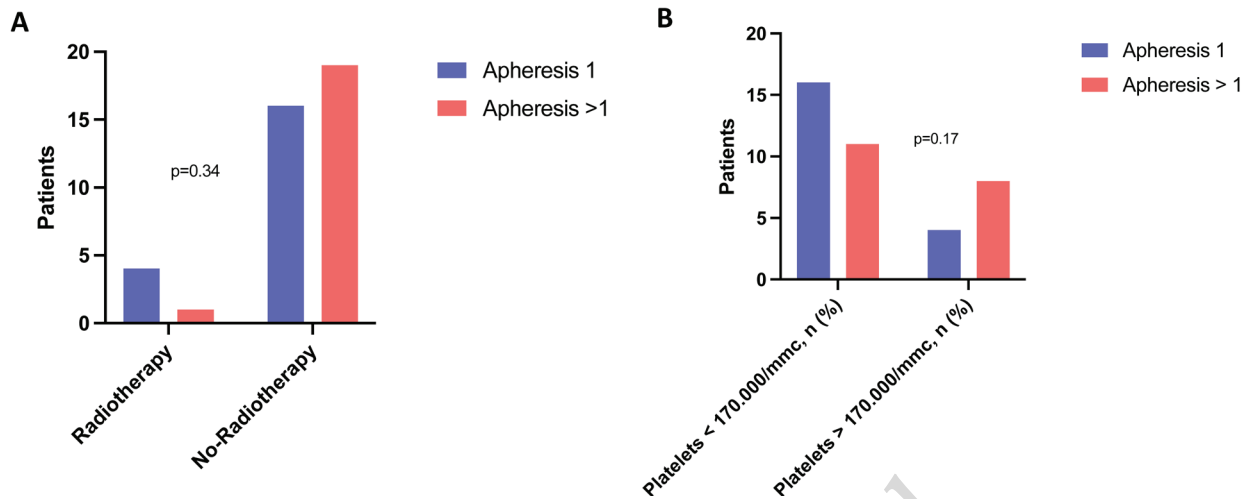

**Figure S3 - Radiotherapy, platelets number and number of apheresis**

Number of patients who did or did not undergo radiotherapy before CD34+ mobilization and needed to undergo one (blue) or more than one (red) apheresis sessions in order to reach the set CD34+ target  
 Number of patients who had less than or more than 170.000/mm<sup>3</sup> platelets and number of apheresis needed to reach the set CD34+ target: one (blue) and more than one (red).

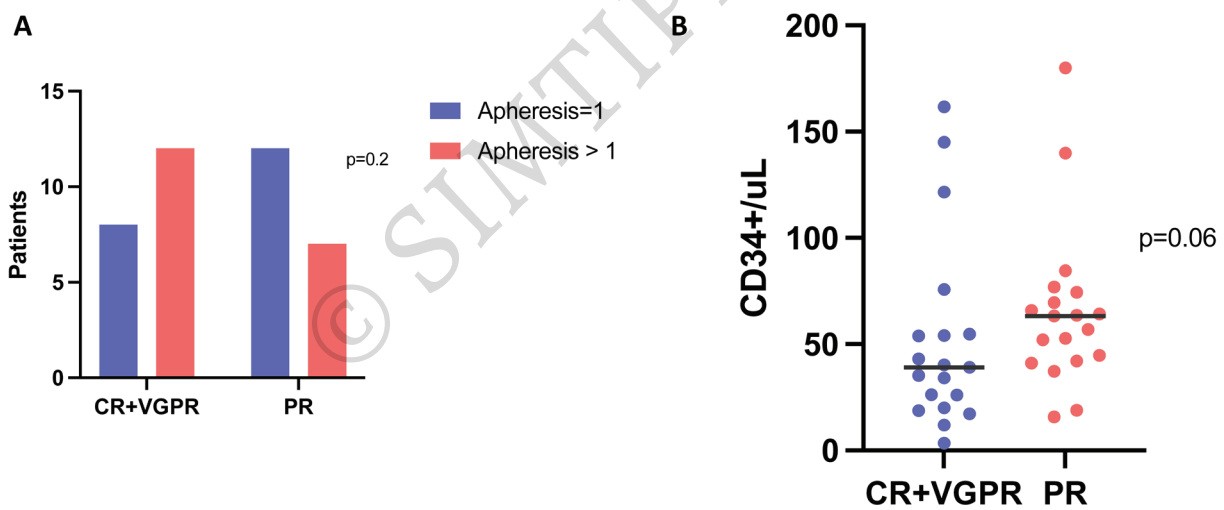

**Figure S4 - Clinical response, number of apheresis and pre-apheresis CD34+ count**

Number of patients who had to undergo one (blue) or more than one (red) apheresis sessions divided into two groups based on the achieved response at time of mobilization (i.e., complete response [CR] or very good partial response [VGPR] and partial response [PR]).  
 Pre-apheresis CD34+ count in patients who had achieved a CR or VGPR as opposed to patients in PR.
